# Supplementary material
Source: Springer Nature journal article supplement (https://www.springermedizin.de/resource/supplementary/12916_2011_511_MOESM4_ESM.pdf/9598130)
Supplement: MOESM4 [file 9598130]

Potentially relevant articles identified from databases  
n = 368

Excluded articles; n = 296

- Not cancer = 20
- Not FNP = 105
- Not children = 19
- Not marker = 117
- No appropriate outcomes = 2
- Not testing marker = 31
- Two gate design = 2

Potentially relevant articles assessed in detail  
n = 72

Identified from reference lists  
n = 7

Excluded articles; n = 52

- Not FNP = 9
- Not children = 7
- Children not extractable = 18
- Not marker = 2
- No appropriate outcomes = 3
- Data not extractable = 1
- Not testing marker = 10
- Duplicate publication = 1
- Original article not available = 1

Data extraction undertaken  
n = 27

‘Duplicate’ publication, n= 2  
(One erratum for previous article & one study published over 2 articles)

Studies with quantitative data available  
n = 25

Included in quantitative synthesis  
n = 13
